# Supplementary material for: Novel design of ultra-fast Si anodes for Li-ion batteries: crystalline Si@amorphous Si encapsulating hard carbon
Source: Royal Society of Chemistry journal article supplement (doi:10.1039/c4nr02394c), 2014-01-01
Supplement: c4nr02394c1.pdf [file c4nr02394c1.pdf]

**Electronic Supplementary Information**

**Novel design of ultra-fast Si anodes for Li-ion batteries:  
crystalline Si@amorphous Si encapsulating hard carbon**

Chanhoon Kim,<sup>a</sup> Minseong Ko,<sup>a</sup> Seungmin Yoo,<sup>a</sup> Sujong Chae,<sup>a</sup> Sinho Choi,<sup>a</sup> Eun-Ho Lee,<sup>b</sup>  
Seunghee Ko,<sup>a</sup> Sang-Young Lee,<sup>a</sup> Jaephil Cho<sup>\*a</sup> and Soojin Park<sup>\*a</sup>

<sup>a</sup> *School of Energy and Chemical Engineering, Ulsan National Institute of Science and  
Technology, Ulsan 689-798, Republic of Korea*

<sup>b</sup> *Department of Chemical Engineering, Kangwon National University, Chuncheon,  
Kangwondo , 200–701 , South Korea*

\* Corresponding authors: [jpcho@unist.ac.kr](mailto:jpcho@unist.ac.kr), [spark@unist.ac.kr](mailto:spark@unist.ac.kr)

## Experimental details

**1) Synthesis of hard carbon:** Agarose was purchased from Sigma-Aldrich. 5 wt% of agarose aqueous solution was prepared by stirring at 90 °C for 1 h. The solution became transparent and then it was moved to a petri dish for cooling at room temperature for 1 h. The resultant product was dried at 70 °C in a convection oven for 12 h. Subsequently, carbonization process of the agarose was conducted in a quartz tube furnace and ramping rate is 5 °C min<sup>-1</sup>. The dried agarose film was heated to 200 °C for 1 h under argon atmosphere for stabilization. After the stabilization, temperature increased to 900 °C for 1h to enhance electrical conductivity and to increase the carbon quality.

**2) Synthesis of HC@c-Si@a-Si:** Amorphous Si (a-Si) was deposited on the HC through chemical vapour deposition using silane (SiH<sub>4</sub>) as Si precursor. The HC particles were placed in a tube furnace and heated to 550 °C at a ramping rate of 5 °C min<sup>-1</sup>. Once the temperature reached to 550 °C, SiH<sub>4</sub> (5% diluted in argon) was introduced into a tube furnace for 36 min with feeding rate of 50 sccm. In order to make stable SEI layer and increase electrical conductivity of HC@a-Si, carbon coating was conducted using acetylene gas. As-synthesized HC@a-Si particles were heated to 900 °C at a ramping rate of 10 °C min<sup>-1</sup> in a quartz tube furnace under argon atmosphere. After temperature reached to 900 °C, we switched the gas in the tube furnace with acetylene gas (10% diluted in argon) and carbon coated on the surface of HC@a-Si for 3 min with 150 sccm.

**3) Synthesis of HC/n-Si composite:** Si nanopowder (~200 nm particle size, Sigma-Aldrich) was carbon coated in the same way of HC@a-Si and mixed with HC (Si/HC = 20/80, wt/wt).

**4) Physical characterization:** HC, HC/n-Si, HC@n-Si@a-Si were characterized by a scanning electron microscope (SEM, S4800, Hitachi) operating at 10 kV. The crystalline structure of HC and HC@n-Si@a-Si were analysed with a powder X-ray diffractometer (MPD) using Cu K $\alpha$  radiation ( $\lambda=1.54056$  Å) between 10° and 90° at a scan rate of 0.01° s<sup>-1</sup>. Raman spectra were obtained from a JASCO spectrometer (NRS-3000, WITec) to investigate the characteristics of the HC and HC@n-Si@a-Si using a He-Ne laser operating at  $\lambda = 632.8$  nm. A dual-beam focused-ion beam (FIB, Helios Nanolab 450HP, FEI) was operated by using Ga ions to observe the cross-section of the HC@n-Si@a-Si samples. To characterize the morphologies of the HC@n-Si@a-Si and carbon coated n-Si, high resolution transmission electron microscope (HR-TEM, JEOL, JEM-2100F) operating at 200 kV. Elemental analysis was conducted on elemental analysis instrument (Thermo Scientific, Netherlands).

**5) Electrochemical measurements:** Electrochemical test was performed using coin-type half and full cells (2016 R-type) assembled in an argon-filled glove box. The anodes (HC, n-Si/HC, HC@n-Si@a-Si) were composed of active materials, super P carbon black, poly(acrylic acid)/sodium carboxymethyl cellulose (50/50 wt%/wt%, Aldrich) binder at a weight ratio of 80:10:10. The resulting slurry was coated on a Cu current collector and dried in a vacuum at 150 °C for 2 h. The mass loading of active materials were ~5 mg cm<sup>-2</sup> for HC and ~3 mg cm<sup>-2</sup> for n-Si/HC and HC@n-Si@a-Si. LiCoO<sub>2</sub>

cathodes were fabricated by coating an N-methyl-2-pyrrolidone (NMP, Aldirch)-based slurry comprising 95 wt% of  $\text{LiCoO}_2$ , 3 wt% of PVDF binder, and 2 wt% of super P carbon black on an aluminium current collector and the mass loading of  $\text{LiCoO}_2$  was  $\sim 9 \text{ mg cm}^{-2}$ . The coin-type half cells consisted of lithium metal as a counter electrode, a polyethylene separator, and 1.3 M  $\text{LiPF}_6$  in ethylene carbonate/diethyl carbonate (EC/ DEC, 3/7 v/v) with 10 wt% fluoroethylene carbonate (FEC) as the electrolytes. The coin-type full cells consisted of synthesized anodes, LCO cathodes, and the same electrolytes and separator with half cells. The cell performance was examined using a cycle tester (Wonatech). The coin-type half cells were cycled at a rate of 0.2–20 C between 0.01 and 2 V, whereas coin-type full cells were cycled at a rate of 0.5–5 C between 2.3 and 4.1 V. The loading levels of active materials were  $1.8 \text{ mAh cm}^{-2}$  (anodes) and  $1.5 \text{ mAh cm}^{-2}$  (cathodes). The AC impedance (frequency range = 10 mHz to 1 MHz at an amplitude of 10 mV) and cyclic voltammetry (scan rate =  $0.1 \text{ mV s}^{-1}$  under 0–2 V) of cells were obtained using a potentiostat/galvanostat (VSP classic, Bio-Logic).

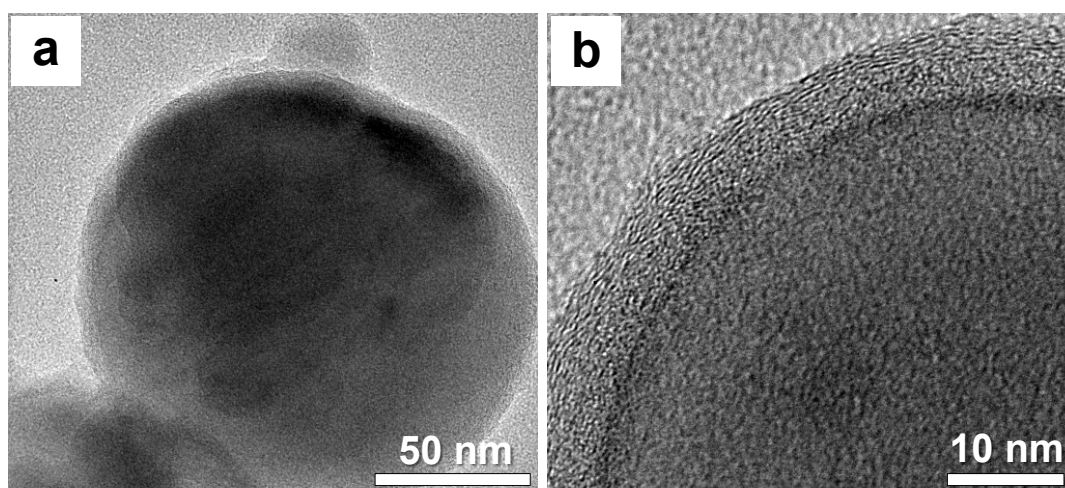

**Fig. S1** The HRTEM images of a) the carbon coated nano-sized crystalline Silicon (n-Si,  $\sim 200 \text{ nm}$ ), b) the magnified n-Si with carbon coating layer of about 5 nm)

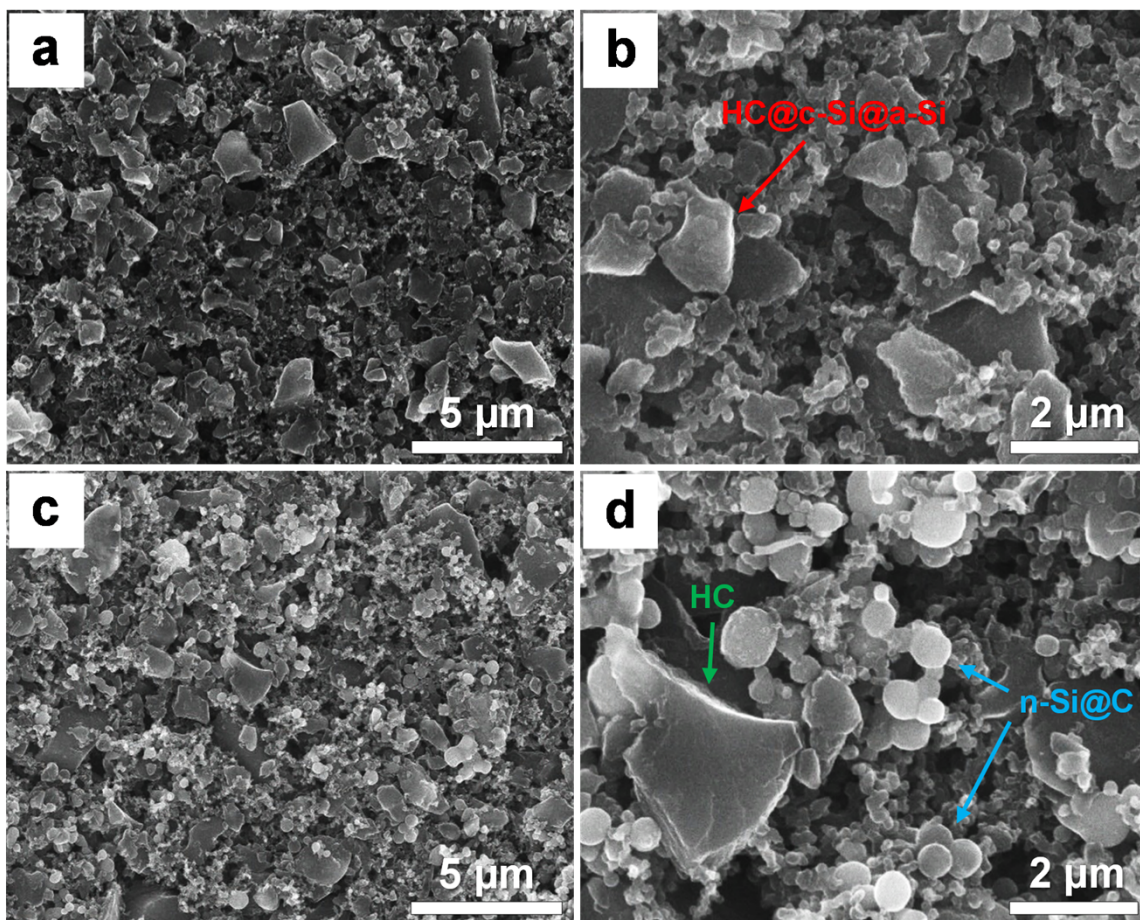

**Fig. S2** The SEM image of pristine electrodes of a) the HC@c-Si@a-Si electrodes and b) the magnified HC@c-Si@a-Si electrodes; The SEM image of pristine electrodes of a) the HC/n-Si electrodes and b) the magnified HC/n-Si electrodes.

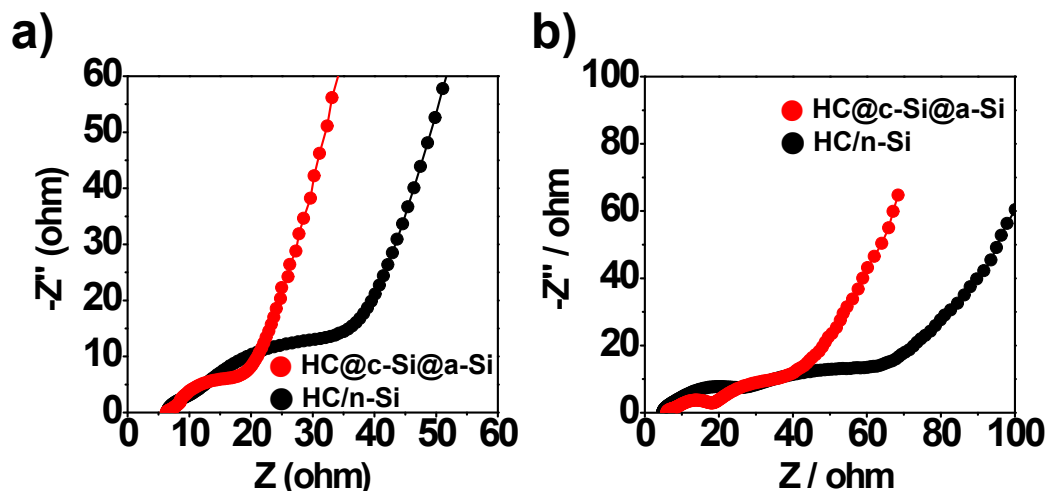

**Fig. S3** Nyquist plots of the electrochemical impedance spectra of HC@c-Si@a-Si and HC/n-Si. a) after 1st cycle, and b) after 200<sup>th</sup> cycles at a rate of 1C.
